# Supplementary material
Source: PubMed Central journal article supplement (PMC5366882)

SUPPLEMENTARY DATA

**Supplemental Table 1.** Plasma NEFA and liver triglyceride levels in aP2-*Hif1a*KO and aP2-*Hif2a*KO mice under control and high fat diets.

|                                        | <i>Hif1a</i><br>CD<br>(n=6) | aP2- <i>Hif1a</i> KO<br>CD<br>(n=6) | <i>Hif2a</i><br>CD<br>(n=4) | aP2- <i>Hif2a</i> KO<br>CD<br>(n=4) | <i>Hif1a</i><br>HFD<br>(n=5) | aP2- <i>Hif1a</i> KO<br>HFD<br>(n=5) | <i>Hif2a</i><br>HFD<br>(n=4) | aP2- <i>Hif2a</i> KO<br>HFD<br>(n=4) |
|----------------------------------------|-----------------------------|-------------------------------------|-----------------------------|-------------------------------------|------------------------------|--------------------------------------|------------------------------|--------------------------------------|
| Plasma NEFA mmol/L (5h fast)           | 1.0±0.07                    | 0.9±0.08                            | 0.8±0.02                    | 1.0±0.05                            | 1.1±0.1                      | 1.1±0.04                             | 0.8±0.05                     | 0.8±0.03                             |
| Liver TAG mmol/L corrected for protein | 0.4±0.07                    | 0.3±0.07                            | 0.2±0.03                    | 0.2±0.05                            | 1.3±0.05                     | 1.2±0.07                             | 1.1±0.16                     | 1.2±0.15                             |

Data are mean±SEM. CD, control chow diet. HFD, high fat diet (58% kcal fat). NEFA, non-esterified fatty acids and TAG, triglycerides.

SUPPLEMENTARY DATA

**Supplementary Figure 1. *Phd2* levels were not affected by adipocyte-specific *Phd2* deletion in other tissues.** (A) A schematic view (upper panel) of the genomic PCR used to detect the recombined *Phd2* allele (450bp) and agarose gel (lower panel) showing recombination in white adipose tissue depots (epi; epididymal, mes; mesenteric), brown adipose tissue (BAT) and isolated adipocytes (adipo). Note recombination in the stromovascular fraction (SVF) but not in isolated peritoneal macrophages (Mφ) in aP2-*Phd2*KO mice. (B) Recombination PCR gels show that there is no recombination (Cre-mediated excision) present in muscle, liver, spleen or heart in aP2-*Phd2*KO tissues. (C) Adipose *Phd2* deficiency (black bars) did not affect adipose *Phd1* or *Phd3* mRNA levels.

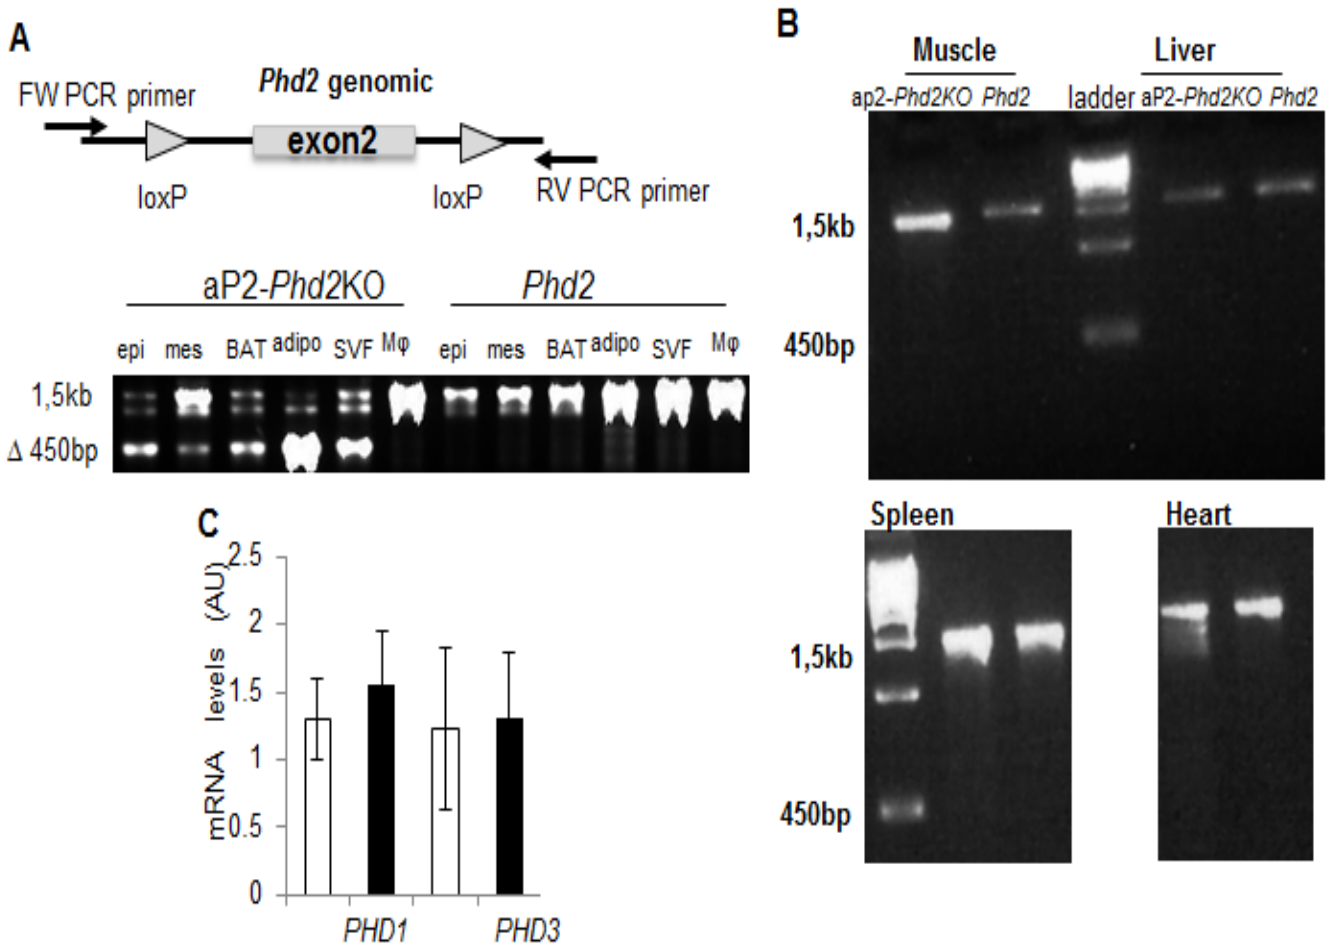

SUPPLEMENTARY DATA

**Supplementary Figure 2. *Hif1a* deficient adipocytes do not respond to hypoxic stimulus and have reduced HIF $\alpha$  target genes.** (A) Adipocytes from aP2-*Hif1a*KO mice (black bars, n=3) and *Hif1a* controls (white bars, n=3) were isolated and cultured in 21% O<sub>2</sub> or 1% O<sub>2</sub> for 6 hours. Cells were then lysed and probed with a HIF1 $\alpha$  antibody. Representative blot (upper panel) and quantification graph (lower panel) showing significantly ablated HIF1 $\alpha$  response in hypoxia in aP2-*Hif1a*KO adipocytes. (B) *Glut1* mRNA levels in isolated aP2-*Hif1a*KO adipocytes (black bars) are ~24 fold lower compared to control *Hif1a* adipocytes (white bars), n=3/group. mRNA levels are corrected for 18S and protein for beta ACTIN levels. AU; arbitrary units. \* p<0.05, \*\* p<0.01, \*\*\* p<0.001 comparisons between genotypes. †p<0.05 comparison of the effect of hypoxia within genotype.

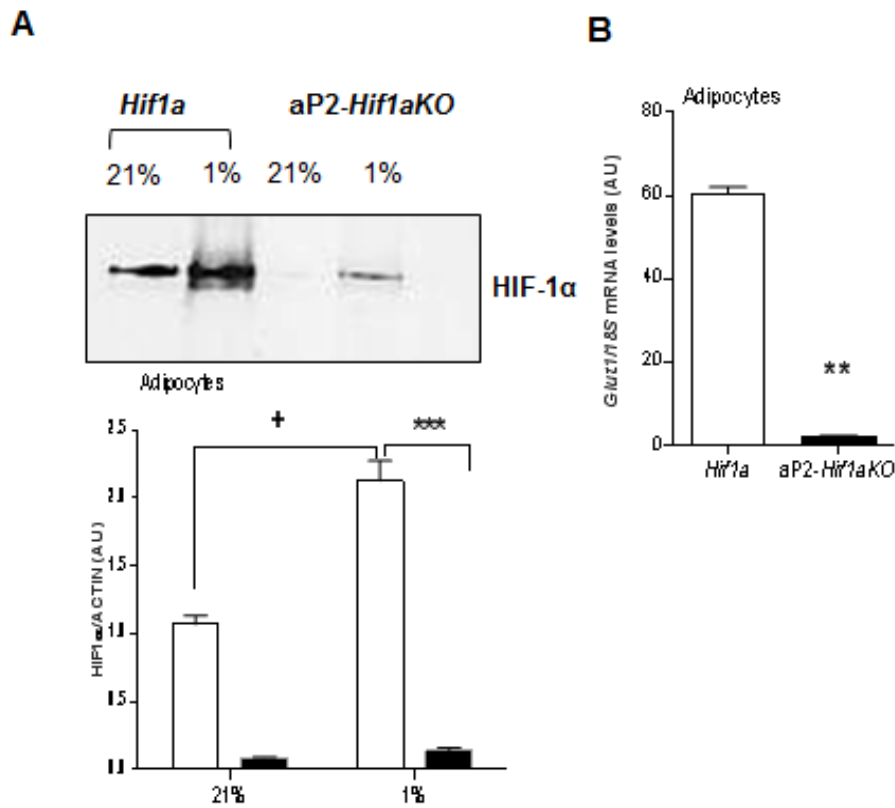

SUPPLEMENTARY DATA

**Supplementary Figure 3. Unaltered pro-fibrotic genes in adipose of aP2-Phd2KO mice.** WAT mRNA levels of pro-fibrotic genes involved in adipose “scarring” such as collagens 1 (*Col1*), 3 (*Col3*), 6 (*Col6*), matrix metalloproteinases 2 and 13 (*Mmp2*, *Mmp13*) and the collagen crosslinking protein lysyl oxydase (*Lox*) in aP2-Phd2KO mice (black bars, n=6) were similar to control littermate levels (white bars, n=5).

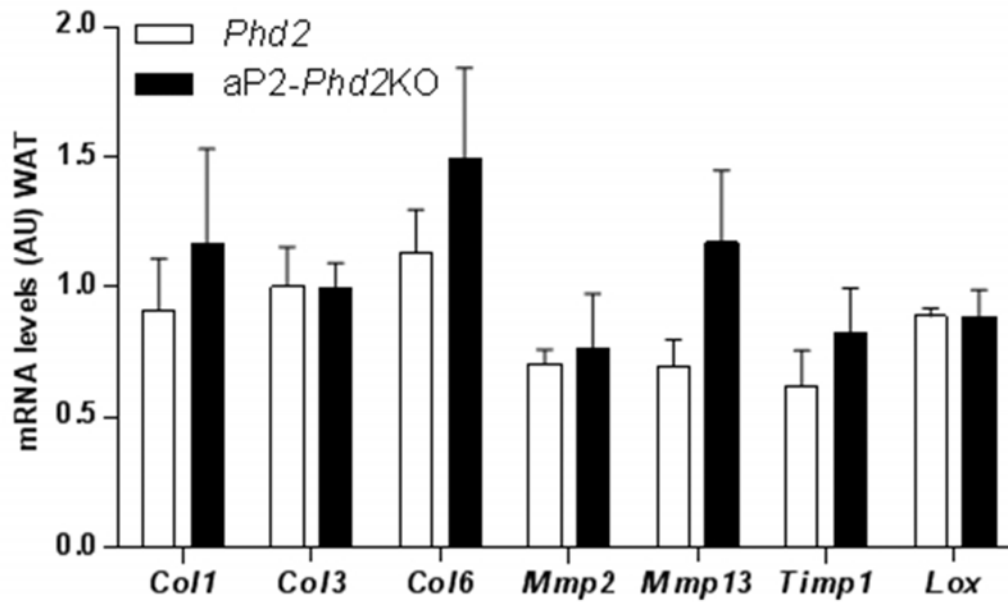

SUPPLEMENTARY DATA

**Supplementary Figure 4. Opposing metabolic responses in aP2-*Hif1a*KO and aP2-*Hif2a*KO mice during High Fat Feeding.** aP2-*Hif1a*KO (A-C) and aP2-*Hif2a*KO (D-F) mice with their littermate controls were fed a High fat diet (HF, 58%kcal fat) for 12 weeks. (A) aP2-*Hif1a*KO (black squares-dashed line, n=6) gained less weight on a HF diet compared to control *Hif1a* mice (open circle-solid line, n=9). (B) aP2-*Hif1a*KO had similar glucose levels during oral glucose tolerance test (OGTT) at 6weeks (open square-dashed line) on HF diet to control mice and retained their glucose response after 12 weeks (black square-bold dashed line) on the diet, in contrast to control mice that showed impairment (open circle versus black circle, n=5/group). (C) Similar insulin levels during the OGTT (n=5/group). (D) aP2-*Hif2a*KO gained similar body weight to control *Hif2a* mice during HF. (E) aP2-*Hif2a*KO showed impaired response to OGTT at 6 and 12 weeks on HF diet and (F) aP2-*Hif2a*KO had higher basal fasting insulin during the OGTT compared to control littermates (n=6/group). \* p<0.05, \*\*p<0.01 comparisons between genotypes and +p<0.05 comparisons of time (6-12 weeks) within genotype.

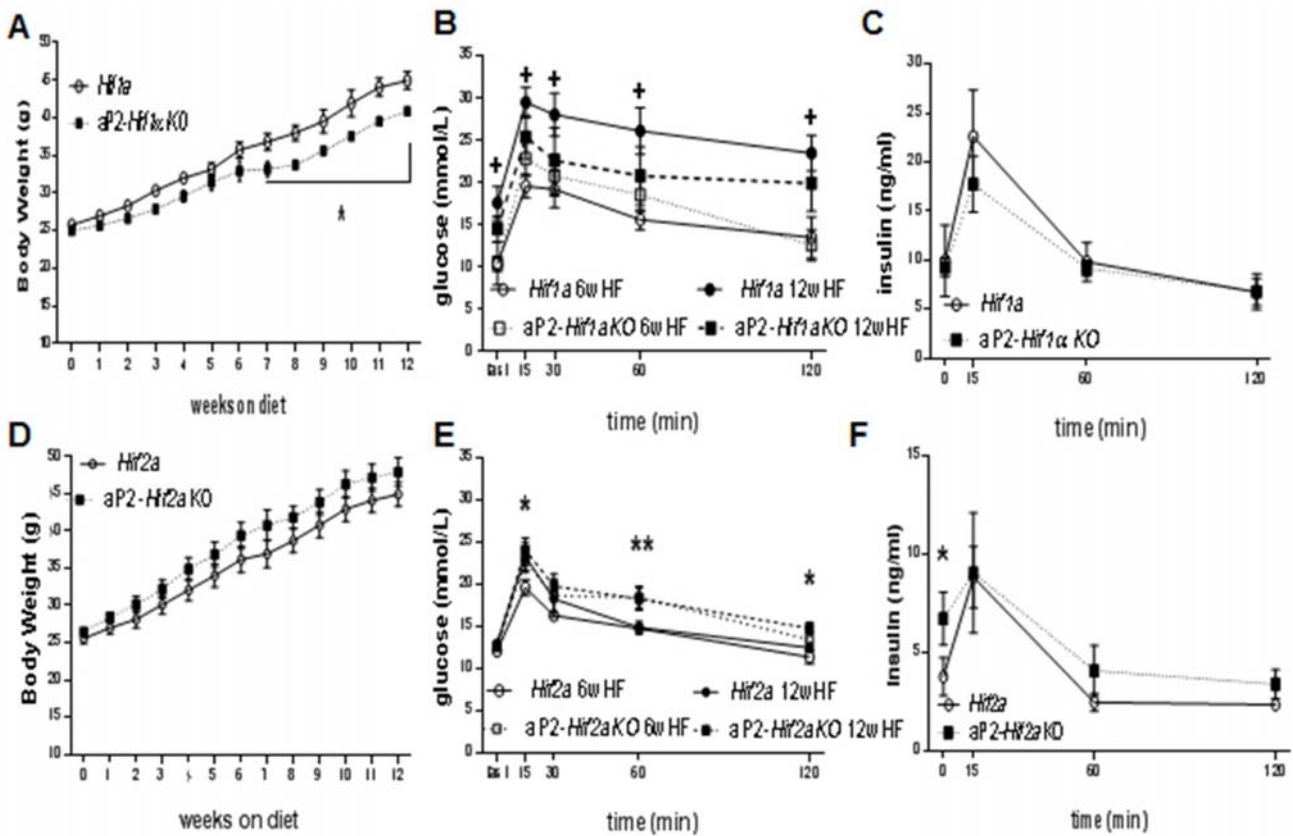

SUPPLEMENTARY DATA

**Supplementary Figure 5. Adipose *Hif1a* deficiency induces NEFA release under hypoxic conditions.** aP2-*Hif1a*KO adipocytes (black bars) cultured in normoxia (21%O<sub>2</sub>) or hypoxia (1%O<sub>2</sub>) and stimulated with CL316,243 show increased lipolytic response in hypoxia (n=4/group). Quantification of immunoblots of) basal and CL316,243 stimulated HSL, phosphorylated HSL and perilipin levels (A-C) (n=3/group) in aP2-*Hif1a*KO adipocytes in hypoxia. Total HSL and perilipin protein levels are corrected for beta ACTIN (AU), and phosphorylated HSL corrected for total HSL (AU). \* p<0.05, \*\*\*p<0.001 comparisons between genotypes.

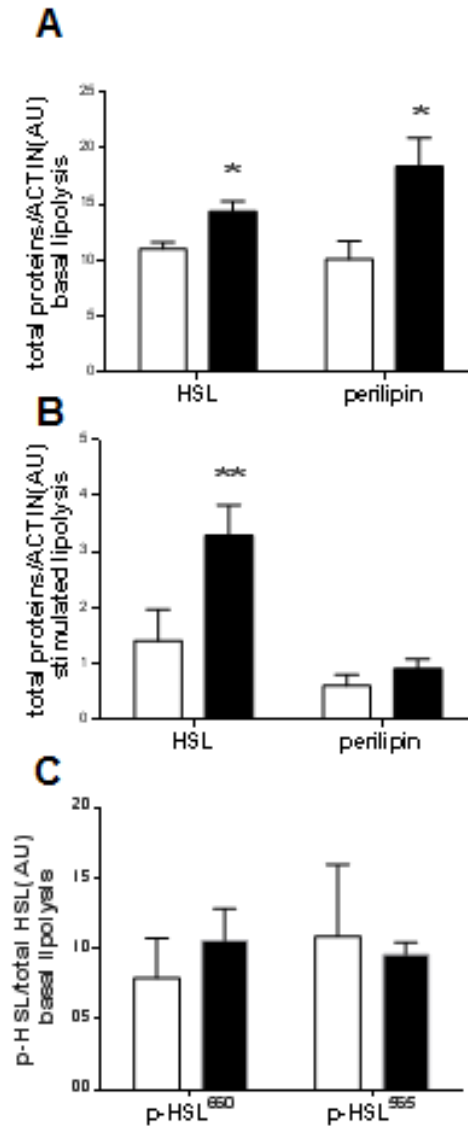

SUPPLEMENTARY DATA

**Supplementary Figure 6. Adipose *Hif2a* deficiency does not affect lipolysis.** (A) NEFA release in medium of Ap2-*Hif2a* (black bars) adipocytes cultured in normoxia (21% O<sub>2</sub>) or hypoxia (1% O<sub>2</sub>) and stimulated with CL316,243 show similar lipolytic response to control *Hif2a* (white bars) adipocytes (n=4/group). (B) Representative immunoblots of basal total HSL levels and quantification graph (n=3/group) in Ap2-*Hif2a* adipocytes in normoxia and hypoxia. (C) Representative immunoblots of CL316,243 stimulated total HSL levels and quantification graph (n=3/group) in Ap2-*Hif2a* adipocytes in normoxia and hypoxia. Protein levels are corrected for beta ACTIN levels.

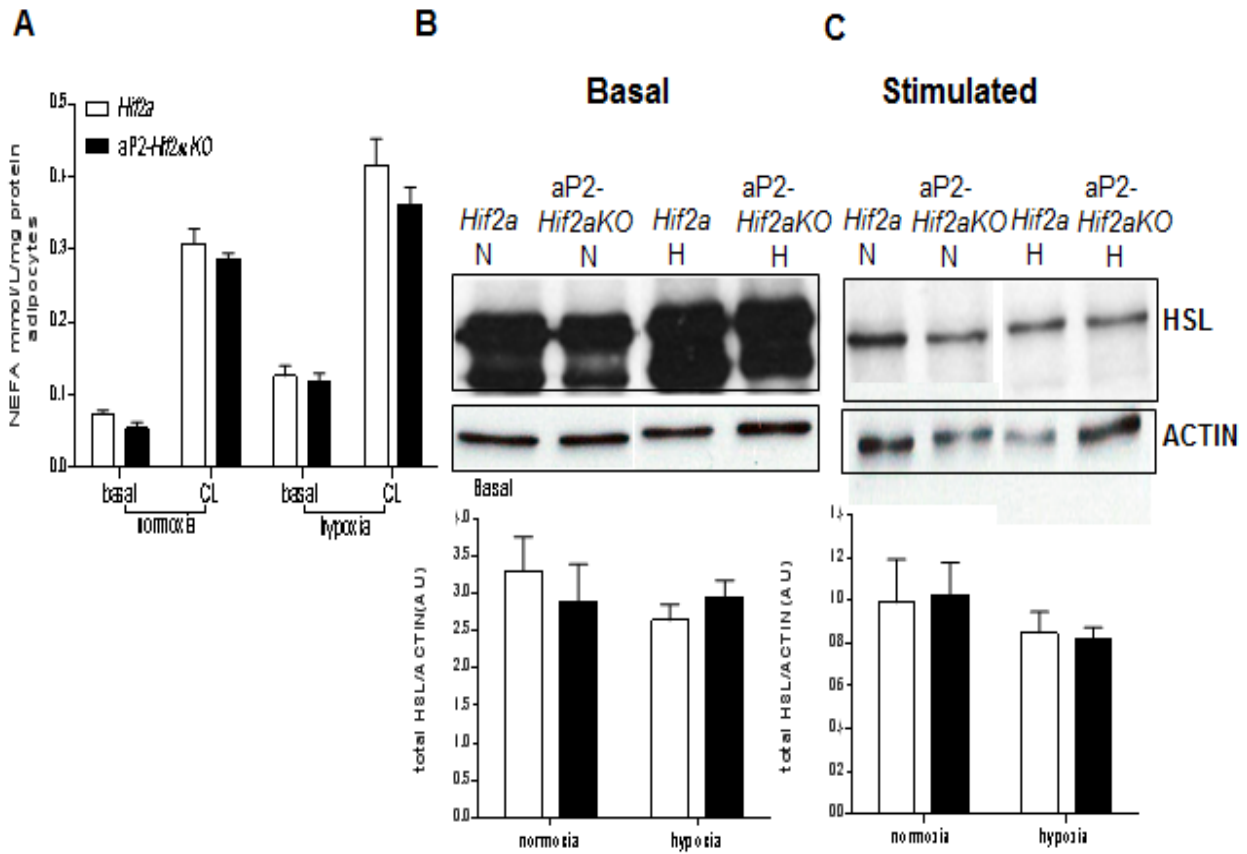

Supplement: DB140233SupplementaryData.pdf [file DB140233SupplementaryData.pdf]
